# Supplementary material for: BDKRB2 is a novel EMT-related biomarker and predicts poor survival in glioma
Source: Aging (Albany NY). 2021 Mar 3;13(5):7499–516. doi: 10.18632/aging.202614 (PMC7993731; doi:10.18632/aging.202614)
Supplement: Supplementary Figures [file aging-13-202614-s001.pdf]

SUPPLEMENTARY FIGURES

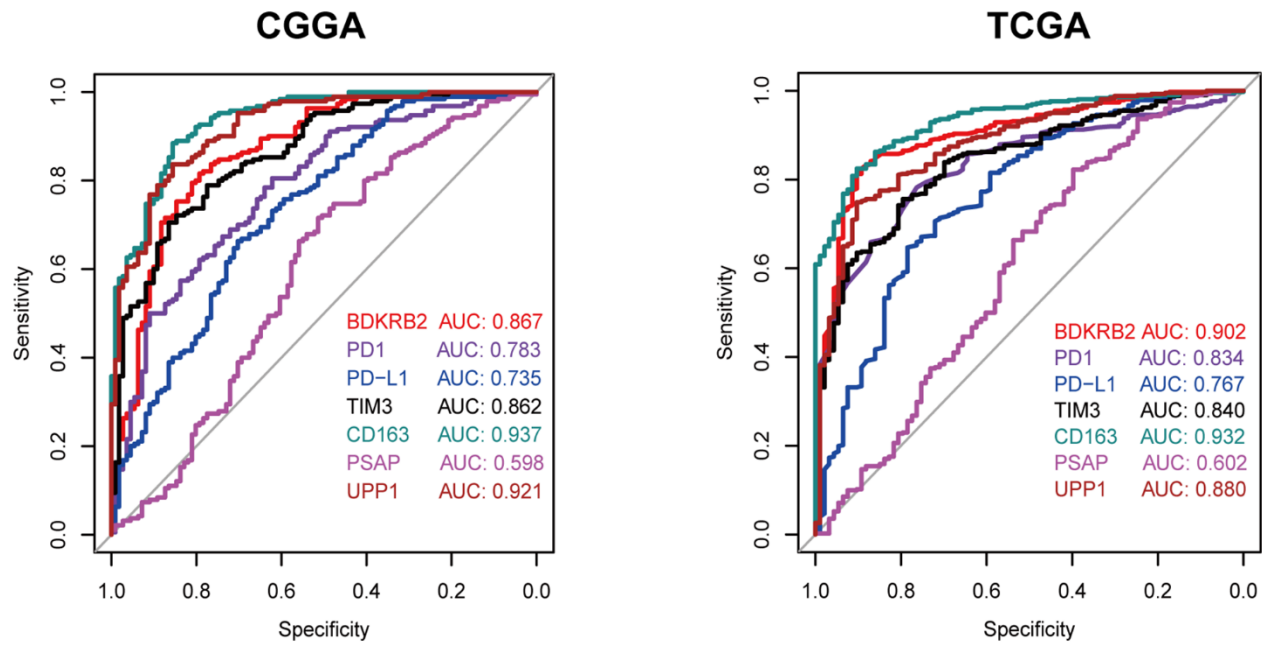

Supplementary Figure 1. Comparison of the diagnostic performance for mesenchymal subtype between BDKRB2 and other biomarkers.

**A**

Venn Diagram of BDKRB2-positively-correlated genes in pan-glioma

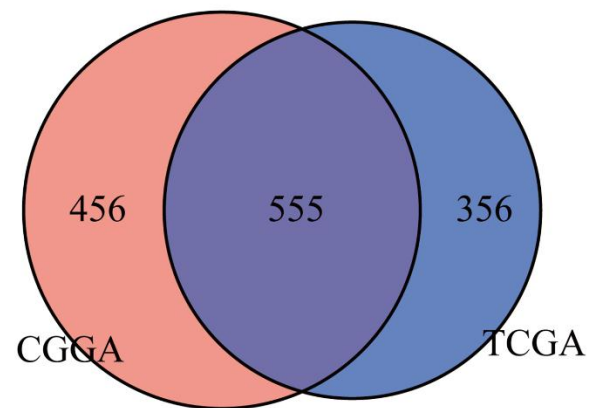

**B**

Venn Diagram of BDKRB2-negatively-correlated genes in pan-glioma

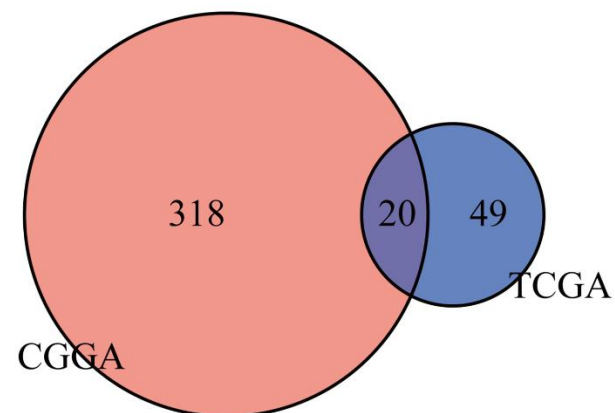

**Supplementary Figure 2.** Venn Diagram of BDKRB2-significantly (**A** positively; **B** negatively)-correlated genes in pan-glioma.

Venn Diagram of BDKRB2-positively-correlated genes in GBM

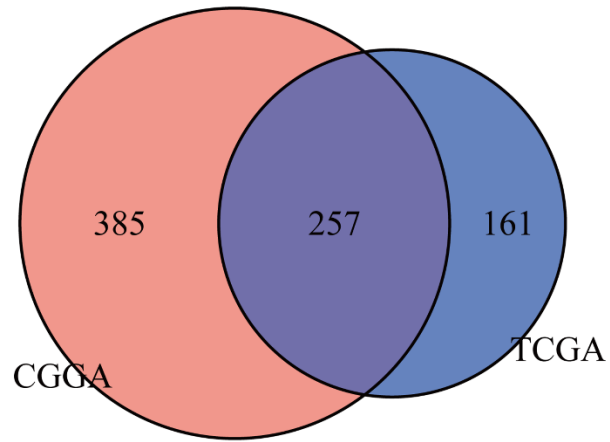

Supplementary Figure 3. Venn Diagram of BDKRB2-positively-correlated genes in glioblastoma.

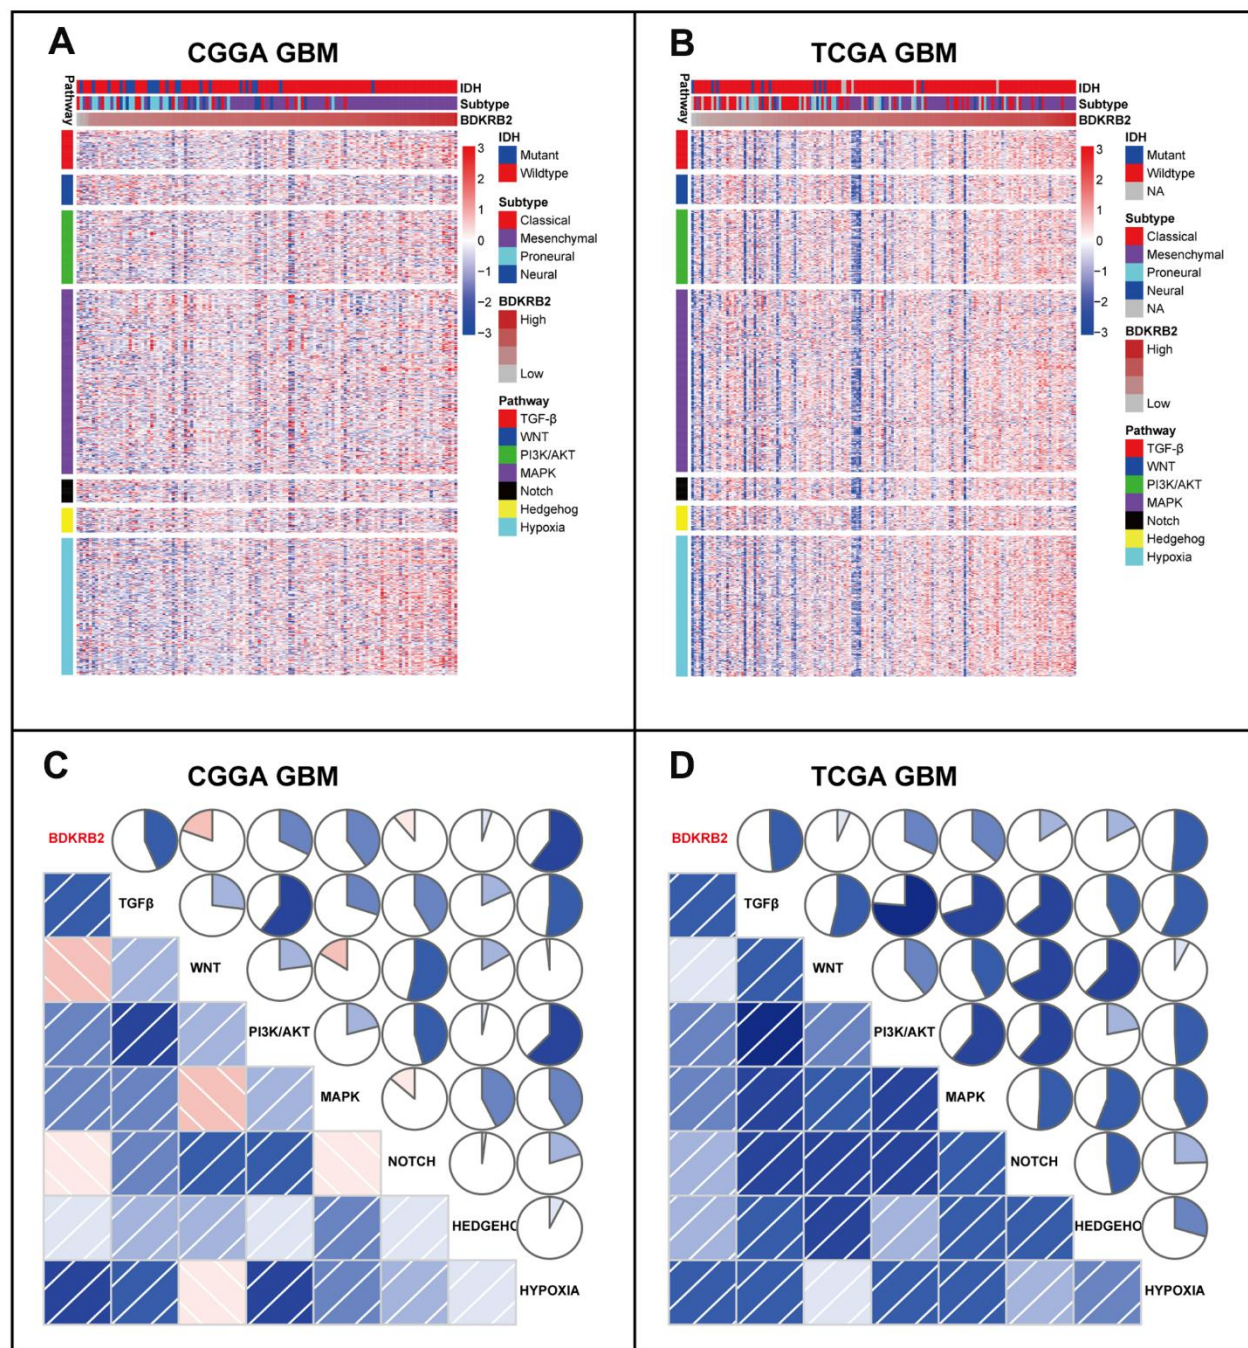

**Supplementary Figure 4.** Cluster (A, B) and GSVA (C, D) of BDKRB2-related EMT signaling pathways in glioblastoma. In C, D, the blue and red colors represent positive and negative correlation, respectively. A darker color and a bigger sectorial area represent a higher correlation coefficient.

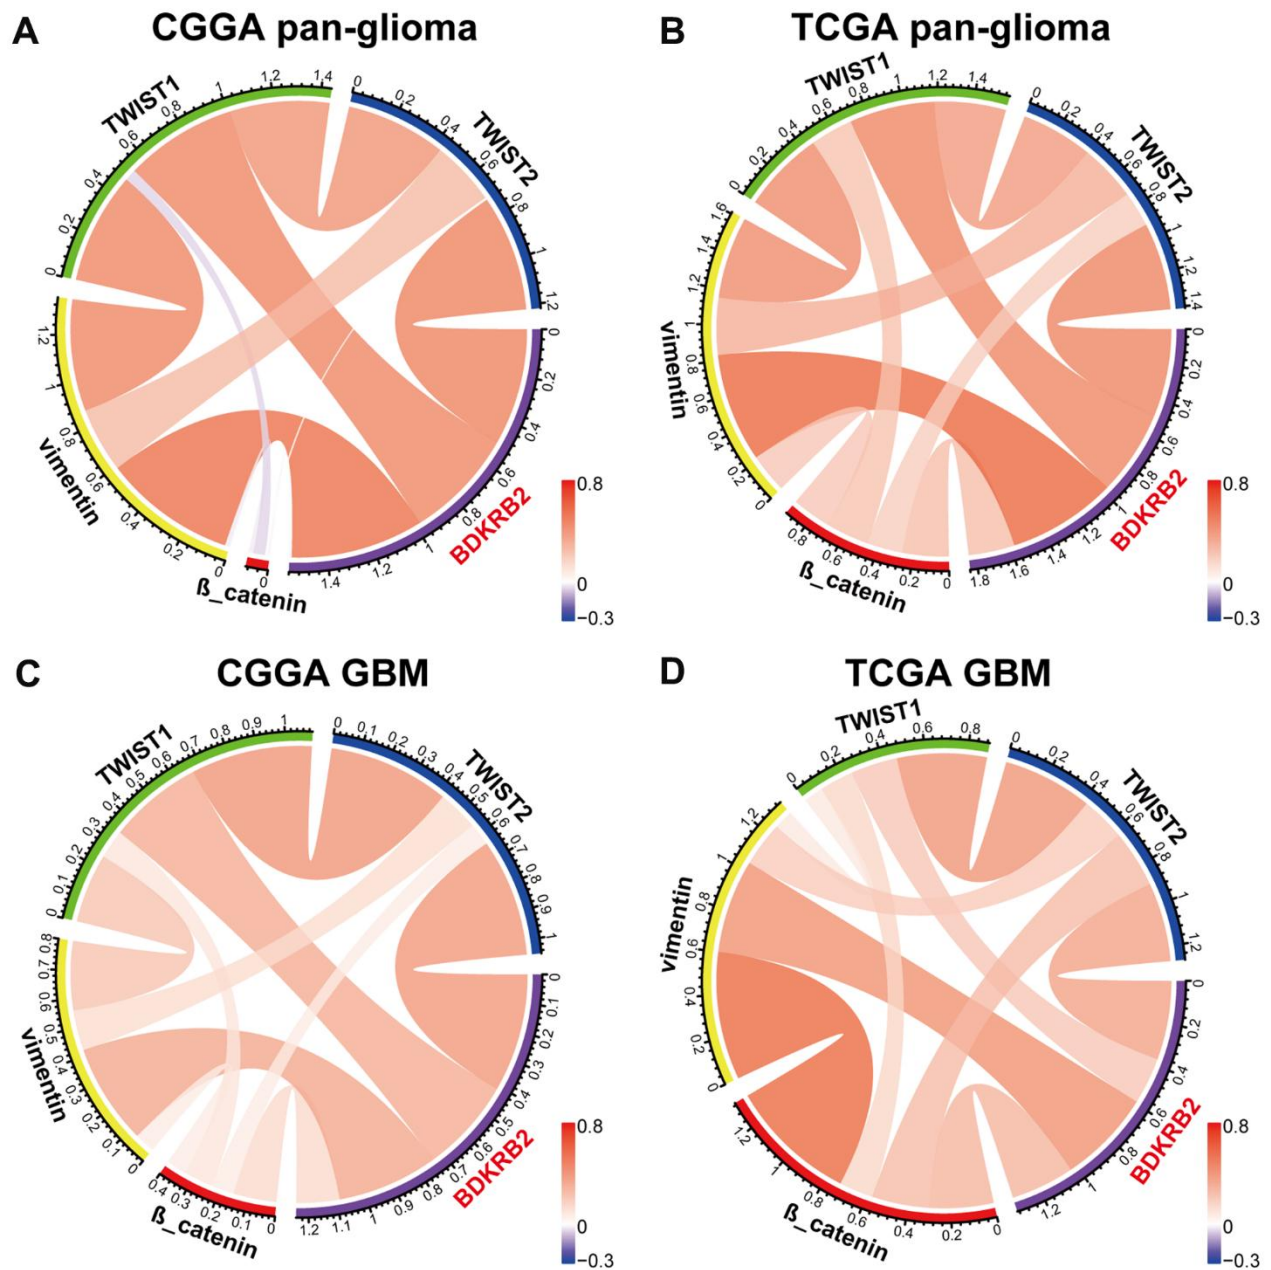

**Supplementary Figure 5.** Correlation of BDKRB2 and other EMT biomarkers in pan-glioma (A, B) and glioblastoma (C, D).
